# Supplementary material for: Intraoperative assessment of skull base tumors using stimulated Raman scattering microscopy
Source: PubMed Central journal article supplement (PMC6938502; doi:10.1038/s41598-019-56932-8), 2019-12-31
Supplement: 41598_2019_56932_MOESM1_ESM.pdf [file 41598_2019_56932_MOESM1_ESM.pdf]

# Intraoperative assessment of skull base tumors using stimulated Raman scattering microscopy

Kseniya S. Shin<sup>1,2</sup>, Andrew T. Francis<sup>1</sup>, Andrew H. Hill<sup>1</sup>, Mint Laohajatsang<sup>1</sup>, Patrick J. Cimino<sup>3</sup>, Caitlin S. Latimer<sup>3</sup>, Louis F. Gonzalez-Cuyar<sup>3</sup>, Laligam N. Sekhar<sup>4</sup>, Gordana Juric-Sekhar<sup>3,4,\*</sup>, and Dan Fu<sup>1,\*\*</sup>

<sup>1</sup>Department of Chemistry, University of Washington, Seattle, 98125-1700, USA

<sup>2</sup>School of Medicine, University of Washington, Seattle, 98125-1700, USA

<sup>3</sup>Department of Pathology, University of Washington, Seattle, 98125-1700, USA

<sup>4</sup>Department of Neurological Surgery, University of Washington, Seattle, 98125-1700, USA

\*gordana@uw.edu

\*\*danfu@uw.edu

## Supplementary information

| Case No | Age/Sex | Symptoms                                  | Location of the neoplasm                                    | Neuropathologic diagnosis                 |
|---------|---------|-------------------------------------------|-------------------------------------------------------------|-------------------------------------------|
| 1       | 62/M    | diplopia, third nerve palsy               | L clinoid process and adjacent cavernous sinus              | Meningioma, WHO grade I                   |
| 2       | 64/F    | dizziness, nausea                         | L posterior fossa                                           | Meningioma, WHO grade I                   |
| 3       | 39/F    | headache, uncontrollable eye movements    | L petrous apex                                              | Chondrosarcoma, grade 2                   |
| 4       | 62/F    | altered mental status                     | R planum shenoidale                                         | Meningioma, WHO grade I                   |
| 5       | 45/M    | headache, ataxia                          | R cerebellopontine angle cystem and internal auditory canal | Cellular schwannoma, WHO grade I          |
| 6       | 46/F    | Bil deteriorated vision and R CN VI palsy | medial sphenoid wing                                        | Schwannoma, WHO grade I                   |
| 7       | 34/F    | headache                                  | R temporobasal near petrous bone                            | Meningioma, WHO grade I                   |
| 8       | 54/F    | incidental finding                        | midline clivus                                              | Chordoma                                  |
| 9       | 46/F    | headache                                  | L torcular/posterior fossa/skull base                       | Meningioma, WHO grade I                   |
| 10      | 71/F    | R deteriorated vision                     | planum shenoidale                                           | Meningioma, WHO grade I                   |
| 11      | 58/F    | R hypoacusia                              | R cerebellopontine angle                                    | Schwannoma, WHO grade I                   |
| 12      | 54/F    | L visual disturbance                      | L spheno-orbital wing                                       | Meningioma, WHO grade I                   |
| 13      | 33/M    | acromegaly                                | sellar and suprasellar                                      | Sparsely granulated somatotroph adenoma   |
| 14      | 60/M    | headache, hyposmia, L hypacusia           | planum shenoidale                                           | Meningioma, WHO grade I                   |
| 15      | 49/M    | bitemporal hemianopsia                    | 3rd ventricle/hypothalamic area                             | Papillary craniopharyngioma (BRAF-mutant) |
| 16      | 45/F    | L visual disturbance                      | L cavernous sinus, middle cranial fossa and sella           | Meningioma, WHO grade I                   |

**Supplementary Table 1.** Descriptive case statistics. Bil-bilateral. F-female. M-male. WHO-world health organization

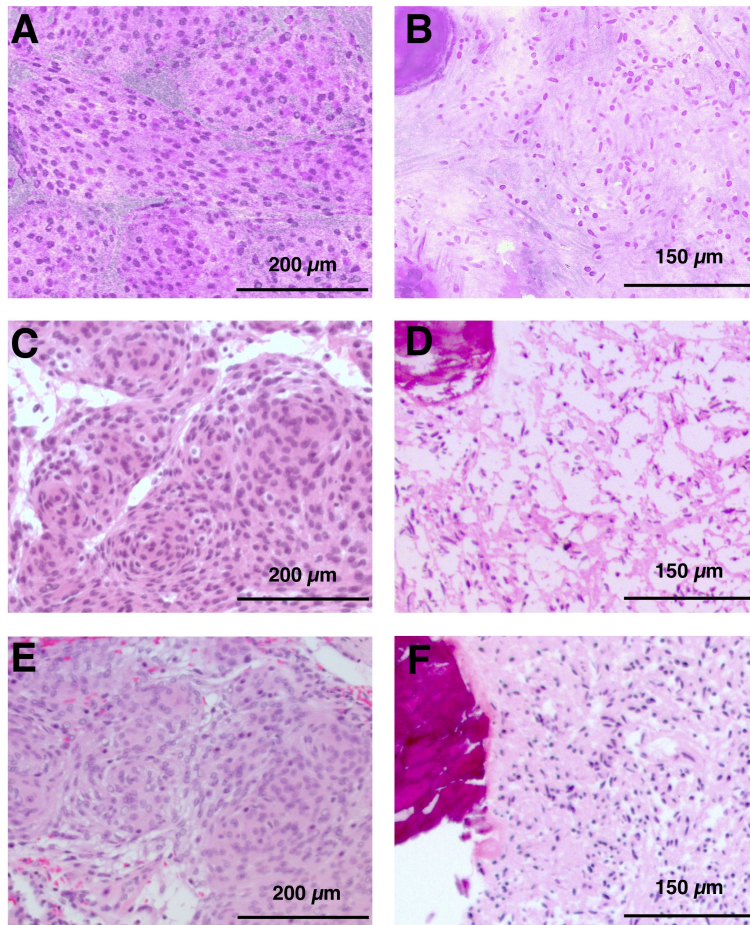

**Supplementary Figure 1.** Comparison of meningioma with and without preoperative endovascular embolization treatment. A) SRH of meningioma case without preoperative embolization. B) SRH of meningioma case with preoperative embolization. C) H&E stained frozen section of meningioma case without preoperative embolization. D) H&E stained frozen section of meningioma case with preoperative embolization. E) H&E stained FFPE section of meningioma case without preoperative embolization. F) H&E stained FFPE section of meningioma case with preoperative embolization.
